# Supplementary material
Source: Springer Nature journal article supplement (https://www.springermedizin.de/resource/supplementary/13048_2009_29_MOESM6_ESM.pdf/9664740)

Without FSH and LH

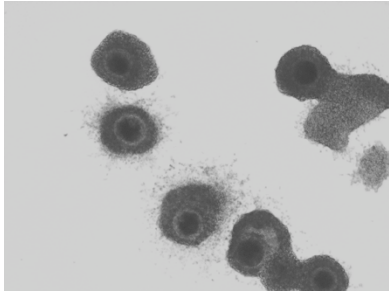

With FSH and LH

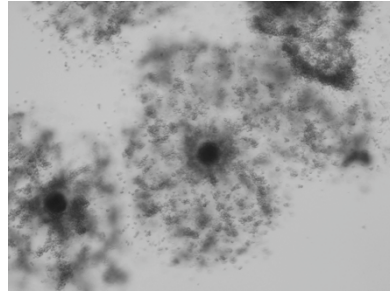

+H89

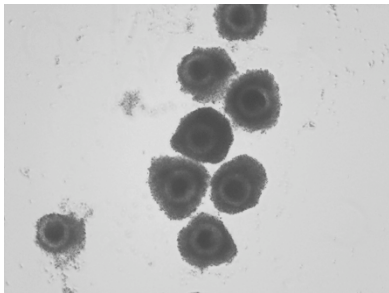

+H89+EGF

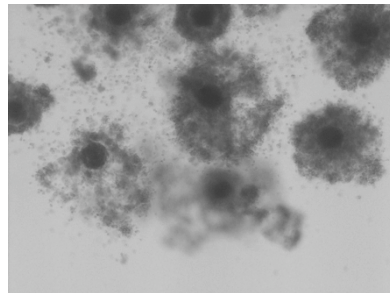

+SB

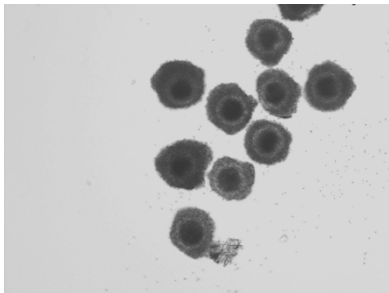

+SB+EGF

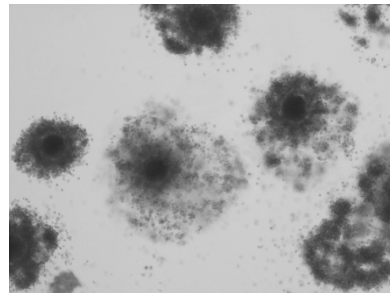

+U0126

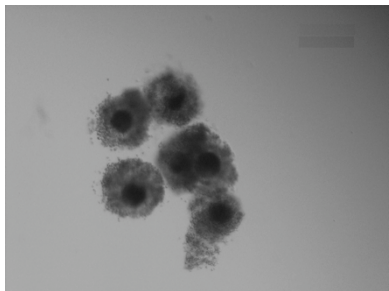

+U0126+EGF

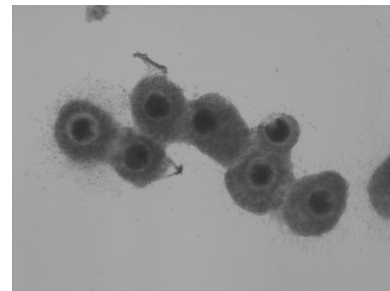

Figure 5.

Supplement: MOESM6 [file 9664740]
